# Supplementary material for: Systematic Identification and Functional Analysis of the <em>Hypericum perforatum</em> L. bZIP Gene Family Indicating That Overexpressed <em>HpbZIP69</em> Enhances Drought Resistance
Source: Preprints.org preprint supplement (doi:10.20944/preprints202307.1848.v1), 2023-07-28
Supplement: Supplementary file 1 [file supplementary]

## Sheet: Sheet2
Supplemental Table S2.Analysis of the pyhsicochemical properties of the HpbZIP gene family of Hypericum perforatum L.
Name	TF ID	Pr.Length	PI	Mol wt. (kDa)	Subcellular localization
HpbZIP2	Hpers110g0063	334	7.63	37.163	Nuleus
HpbZIP60	Hpers065g0004	312	5.55	34.6981	Nuleus
HpbZIP52	Hpers440g0014	319	6.48	35.653	Nuleus
HpbZIP39	Hpers359g0140	342	8.19	38.1274	Nuleus
HpbZIP58	Hpers064g0070	417	8.82	44.7348	Nuleus
HpbZIP8	Hpers129g0045	416	9.36	45.5443	Nuleus
HpbZIP14	Hpers015g0387	431	9.27	46.2136	Nuleus
HpbZIP69	Hpers079g0265	374	9.4	40.2782	Nuleus
HpbZIP18	Hpers202g0035	281	9.37	30.6742	Nuleus
HpbZIP44	Hpers388g0245	253	7.32	27.7556	Nuleus
HpbZIP71	Hpers079g0508	249	9.42	26.718	Nuleus
HpbZIP13	Hpers015g0272	211	9.74	22.5863	Nuleus
HpbZIP53	Hpers447g0181	208	10.02	22.292	Nuleus
HpbZIP26	Hpers025go111	359	6.1	38.7635	Nuleus
HpbZIP19	Hpers214g0095	414	7.15	44.5517	Nuleus
HpbZIP51	Hpers434g0129	358	6.81	38.4633	Nuleus
HpbZIP64	Hpers068g0034	384	6.73	41.0932	Nuleus
HpbZIP57	Hpers060g0093	312	6.27	33.7612	Nuleus
HpbZIP62	Hpers068g0201	298	7.75	32.2566	Nuleus
HpbZIP34	Hpers003g0093	421	8.59	47.6304	Nuleus
HpbZIP35	Hpers032g0165	364	8.35	41.2129	Nuleus
HpbZIP47	Hpers406g0051	433	5.76	47.7327	Nuleus
HpbZIP4	Hpers117g0081	367	9.23	41.4924	Nuleus
HpbZIP20	Hpers219g0162	360	6.27	40.1532	Nuleus
HpbZIP40	Hpers359g0142	473	6.56	52.51	Nuleus
HpbZIP56	Hpers055g0101	351	9.2	39.9836	Nuleus
HpbZIP22	Hpers245g0114	385	6.46	42.9477	Nuleus
HpbZIP23	Hpers245g0144	445	6.35	49.1039	Nuleus
HpbZIP65	Hpers069g0125	313	9.18	34.8982	Nuleus
HpbZIP72	Hpers081g0115	332	8.63	37.0836	Nuleus
HpbZIP36	Hpers346g0028	484	5.86	53.2025	Nuleus
HpbZIP38	Hpers358g0046	386	8.69	43.38	Nuleus
HpbZIP74	Hpers081g0357	371	7.85	41.728	Nuleus
HpbZIP29	Hpers026g0045	229	5.59	25.3868	Nuleus
HpbZIP45	Hpers039g0221	256	5.83	28.6758	Nuleus
HpbZIP76	Hpers094g0489	301	5.86	33.0889	Nuleus
HpbZIP25	Hpers025g0100	326	8.01	35.9884	Nuleus
HpbZIP37	Hpers346g0327	316	6.46	34.7065	Nuleus
HpbZIP50	Hpers432g0028	590	8.47	64.4223	Nuleus
HpbZIP79	Hpers097g0718	575	6.95	62.6489	Nuleus
HpbZIP17	Hpers158g0035	319	6.12	35.4528	Nuleus
HpbZIP67	Hpers072g0052	337	6.4	36.7061	Nuleus
HpbZIP48	Hpers422g0094	311	5.93	34.7484	Nuleus
HpbZIP49	Hpers422g0216	395	6.1	43.5503	Nuleus
HpbZIP21	Hpers241g0038	218	4.65	23.3574	Nuleus
HpbZIP32	Hpers276g0096	687	6.43	73.8066	Nuleus
HpbZIP31	Hpers273g0064	164	8.83	18.8028	Nuleus
HpbZIP11	Hpers141g0375	171	9.68	18.3181	Nuleus
HpbZIP30	Hpers270g0001	165	9.83	17.9317	Nuleus
HpbZIP41	Hpers036g0271	164	9.9	17.8286	Nuleus
HpbZIP3	Hpers112g0023	196	5.59	22.7812	Nuleus
HpbZIP16	Hpers151g0548	180	5.38	20.6907	Nuleus
HpbZIP15	Hpers151g0176	186	5.92	21.6132	Nuleus
HpbZIP24	Hpers245g0078	204	5.79	23.228	Nuleus
HpbZIP9	Hpers130g0101	203	9.35	23.0152	Nuleus
HpbZIP63	Hpers068g0374	185	10.01	21.3189	Nuleus
HpbZIP6	Hpers120g0068	370	5.98	40.1525	Nuleus
HpbZIP55	Hpers050g0024	229	8.24	25.8435	Nuleus
HpbZIP73	Hpers081g0251	231	7.63	25.781	Nuleus
HpbZIP43	Hpers381g0029	274	6.6	30.0005	Nuleus
HpbZIP59	Hpers064g0732	200	8.51	22.1453	Nuleus
HpbZIP42	Hpers037g0457	150	5.68	17.2513	Nuleus
HpbZIP46	Hpers395g0002	119	10.21	14.2662	Nuleus
HpbZIP68	Hpers079g0023	151	8.76	17.8221	Nuleus
HpbZIP5	Hpers118g0008	145	7.88	16.6229	Nuleus
HpbZIP77	Hpers094g0075	145	6.12	16.3734	Nuleus
HpbZIP1	Hpers010g0104	152	5.46	16.8739	Nuleus
HpbZIP66	Hpers071g0254	153	6.14	16.9861	Nuleus
HpbZIP7	Hpers120g0076	379	6.04	41.0904	Nuleus
HpbZIP75	Hpers094g0160	377	5.23	40.3126	Nuleus
HpbZIP27	Hpers254g0280	357	5.07	38.4933	Nuleus
HpbZIP10	Hpers014g0020	335	5.87	36.3353	Nuleus
HpbZIP28	Hpers255g0003	332	5.99	35.9349	Nuleus
HpbZIP61	Hpers068g0142	142	6.11	15.6635	Nuleus
HpbZIP33	Hpers003g0141	154	6.91	17.0751	Nuleus
HpbZIP78	Hpers097g0671	157	7.97	17.7008	Nuleus
HpbZIP70	Hpers079g0423	172	6.74	19.3506	Nuleus
HpbZIP12	Hpers015g0198	155	6.91	17.6036	Nuleus
HpbZIP54	Hper447g0255s	155	6.91	17.5855	Nuleus
