# Supplementary material for: Systematic Identification and Functional Analysis of the <em>Hypericum perforatum</em> L. bZIP Gene Family Indicating That Overexpressed <em>HpbZIP69</em> Enhances Drought Resistance
Source: Preprints.org preprint supplement (doi:10.20944/preprints202307.1848.v1), 2023-07-28
Supplement: Supplementary file 3 [file Supplemental Table 1.xlsx]

## Sheet: Sheet1
Supplementary Table S1. Primers used in this study
Primer name	Primer Sequence (5' to 3')	Annotation
HpbZIP69-F	ATGAACATGGACGAGCTGC	gene clone
HpbZIP69-R	TCACCACGGACCGGTCT	gene clone
GW- HpbZIP69-F	GGGGACAAGTTTGTACAAAAAAGCAGGCTTCATGAACATGGACGAGCTGC	gateway
GW- HpbZIP69-R	GGGGACCACTTTGTACAAGAAAGCTGGGTCCCACGGACCGGTCT	gateway
GW- HpbZIP69-R1	GGGGACCACTTTGTACAAGAAAGCTGGGTCTCACCACGGACCGGTCT	gateway
GW-NbZIP69-R	GGGGACCACTTTGTACAAGAAAGCTGGGTCTTGCCTTCGCTCAACCAC	gateway
GW-NDbZIP69-R	GGGGACCACTTTGTACAAGAAAGCTGGGTCTGTATAAGCCTGCTTCCGAG	gateway
GW-CbZIP69-F	GGGGACAAGTTTGTACAAAAAAGCAGGCTTCCATATGGAACTGGAAGCAGAAATAG	gateway
GW-CDbZIP69-F	GGGGACAAGTTTGTACAAAAAAGCAGGCTTCCATATGAGGAGGATGATCAAAAACA	gateway
G-box-EcoRI-F	AGGAATTCCCAACCAATCCCATCCAACACG	G-box fused pHis2 vector
G-box-SacI-R	TCGAGCTCGCATGAACAACGTGGAGATGACC	G-box fused pHis2 vector
HpbZIP69-qPCRF1	GCCAAGTGGAGGCCTTGGAA	qRT-PCR
HpbZIP69-qPCRR1	CGCAAACCCGTCTGAGGACA	qRT-PCR
HpbZIP11-qPCRF1	CTGGAGAAGGTGGGCAGAGGA	qRT-PCR
HpbZIP11-qPCRR1	CCCTTGCCTGTTGGGCAGAT	qRT-PCR
HpbZIP14-qPCRF1	CACGTTGGCATCCGCAAACC	qRT-PCR
HpbZIP14-qPCRR1	GCTGCTGCTGCTGAGACTGT	qRT-PCR
HpbZIP19-qPCRF1	GCCTGTTGCTCCAGGCATGA	qRT-PCR
HpbZIP19-qPCRR1	TGGCAGCACAACACCGGATT	qRT-PCR
HpbZIP69-qPCRF1	GCCAAGTGGAGGCCTTGGAA	qRT-PCR
HpbZIP69-qPCRR1	CGCAAACCCGTCTGAGGACA	qRT-PCR
HpbZIP27-qPCRF1	GAGAGCCGGCGAGATGATGG	qRT-PCR
HpbZIP27-qPCRR1	ACCGGACCAAAGGTCTCCGA	qRT-PCR
HpbZIP31-qPCRF1	CCCGTCGACAAGGAGTACCGA	qRT-PCR
HpbZIP31-qPCRR1	TCTTGGGCTCTGGATTCGAGGT	qRT-PCR
HpbZIP37-qPCRF1	GCTTTCAACCGTAGCCTGCCT	qRT-PCR
HpbZIP37-qPCRR1	GGAGGTTGCCCGTTCTGGAC	qRT-PCR
HpbZIP40-qPCRF1	CTGCGGCAGATCTTGACGGT	qRT-PCR
HpbZIP40-qPCRR1	CCGGCCGTAGTACTCTCCGA	qRT-PCR
HpbZIP50-qPCRF1	TGAGGCCGAGAGCAGTGTGA	qRT-PCR
HpbZIP50-qPCRR1	CCGGCACTCCTCTTCCTTTCC	qRT-PCR
HpbZIP51-qPCRF1	CCCAGCGCACTGGAGCTTTA	qRT-PCR
HpbZIP51-qPCRR1	GGTCATTCTTGCCTGCCCTGA	qRT-PCR
HpbZIP52-qPCRF1	GACCGTTTGGACGGCTGAGG	qRT-PCR
HpbZIP52-qPCRR1	TCATCGGCGAGCTGTGAACC	qRT-PCR
HpbZIP75-qPCRF1	AGGTGAGGCAGACCACCAGT	qRT-PCR
HpbZIP75-qPCRR1	GCGTCTTGCTGACTCACGGT	qRT-PCR
q-HpACT2-F	AGGAGTCCCTCCACGACCAC	qRT-PCR inner control
q-HpACT2-R	GCCGTTGTGTACCGGGTAGG	qRT-PCR inner control
q-AtACTIN2-F	GAAAAGATCTGGCATCACACTTTATA	qRT-PCR inner control
q-AtACTIN2-R	ACATACATAGCGGGAGAGTTAAAGGT	qRT-PCR inner control
