# Supplementary material for: Systematic Identification and Functional Analysis of the <em>Hypericum perforatum</em> L. bZIP Gene Family Indicating That Overexpressed <em>HpbZIP69</em> Enhances Drought Resistance
Source: Preprints.org preprint supplement (doi:10.20944/preprints202307.1848.v1), 2023-07-28
Supplement: Supplementary file 5 [file Supplemental Table 3.xlsx]

## Sheet: Sheet3
Supplemental Table S3. Normal expression sequences of 15 motifs identified in Hypericum perforatum bZIP genes
Motif	Length	Frequency	Normal expression sequences
1	21	79	RRMIKNRESAARSRARKQAYT
2	50	11	KADVFHLLSGMWKTPAERCFLWLGGFRSSELLKLLINQLEPLTEQQLAGI
3	21	62	SELEHKVQTLQTEATTLSAQL
4	50	13	AAFEMEYGHWVEEQHRQIIDLRTALHSHIGDIELRLLVDNGLSHYNNLFR
5	50	11	TLLQRDTSGLTVENKELNLRLLAMEQQAQLRNALNETLRDEVHRLKIATG
6	50	9	FIRQADNLRQQTLQQMHRILTTRQSARALLAIHDYFSRLRALSSLWLARP
7	21	21	TQHFLAVEAENSVLRAQMVELSHRLESLN
8	38	11	TNLQQSSQQAEDALSQGMEALQQSLAETLSSGSLGSSG
9	29	10	QQLESSRIKLTQLEQELQRVRQQGLLLGG
10	27	12	LTLPRTLSQKTVEEVWKDMSKNLLGGS
11	22	9	RQSTLGEMTLEDFLEKAGVVAE
12	28	8	GGGEVMEAKKAMPPDKLAELWNLDPKRA
13	34	5	PYGAVYPHGGMYGHPAVPLGPHPHATGVPSSPVA
14	50	3	PGHWMQYPITQYQHPQQNMMGVYMQGQTMQQPLHMGGGPLMDVPFAESQV
15	19	8	MNMDELLKNIWTAEETQTM
