# Supplementary material for: Systematic Identification and Functional Analysis of the <em>Hypericum perforatum</em> L. bZIP Gene Family Indicating That Overexpressed <em>HpbZIP69</em> Enhances Drought Resistance
Source: Preprints.org preprint supplement (doi:10.20944/preprints202307.1848.v1), 2023-07-28
Supplement: Supplementary file 6 [file Supplemental Table 4.xlsx]

## Sheet: Sheet4
Supplementary Table S4. Putative cis-acting elements identified in the promoter regions of 79 HpbZIP genes.
	Name	Number	Annotation
	TATA-box	78	core promoter element around -30 of transcription start
	CAAT-box	78	common cis-acting element in promoter and enhancer regions
	A-box	25	cis-acting regulatory element
	OBP-1 site	5	cis-acting regulatory element
Transcription	ATGCAAAT motif	13	cis-acting regulatory element associated to the TGAGTCA motif
	5UTR Py-rich stretch	44	cis-acting element conferring high transcription levels,
	AT-rich element	10	binding site of AT-rich DNA binding protein (ATBP-1)
Cell cycle	circadian	61	cis-acting regulatory element involved in circadian control
	MSA-like	5	cis-acting element involved in cell cycle regulation
	E2Fa	1
	E2Fb	1	/
	Skn-1_motif	69	cis-acting regulatory element required for endosperm expression
	GCN4_motif	36	cis-regulatory element involved in endosperm expression
	CCGTCC-box	24	cis-acting regulatory element related to meristem specific activation
	CAT-box	31	cis-acting regulatory element related to meristem expression
	OCT	0
	dOCT	2	cis-acting regulatory element related to meristem specific activation
	NON-box	0
	RY-element	3	cis-acting regulatory element involved in seed-specific regulation
	HD-Zip 1	4	element involved in differentiation of the palisade mesophyll cells
Development	HD-Zip 2	4	element involved in the control of leaf morphology development
	as1	2	cis-acting regulatory element involved in the root-specific expression
	motif I	0
	AC-I	9	/
	AC-II	11	light responsive element
	ABRE	45	cis-acting element involved in the abscisic acid responsiveness
	motif IIb	0	abscisic acid responsive element
	CE3	2	cis-acting element involved in ABA and VP1 responsiveness
	CE1	0	cis-acting element associated to ABRE, involved in ABA responsiveness
	GARE-motif	46	gibberellin-responsive element
	P-box	25	gibberellin-responsive element
	TATC-box	9	cis-acting element involved in gibberellin-responsiveness
	TCA-element	49	cis-acting element involved in salicylic acid responsiveness，
	SARE	1	cis-acting element involved in salicylic acid responsiveness
	TGA-element	30	auxin-responsive element
	AuxRR-core	14	cis-acting regulatory element involved in auxin responsiveness
Hormone	TGA-box	2	part of an auxin-responsive element
	AuxRE	0
	O2-site	40	cis-acting regulatory element involved in zein metabolism regulation
	ERE	14	ethylene-responsive element
	CGTCA-motif	47	cis-acting regulatory element involved in the MeJA-responsiveness
	TGACG-motif	47	cis-acting regulatory element involved in the MeJA-responsiveness
	TC-rich repeats	52	cis-acting element involved in defense and stress responsiveness
	ARE	62	cis-acting regulatory element essential for the anaerobic induction
	GC-motif	21	enhancer-like element involved in anoxic specific inducibility
	ELI-box3	4	elicitor-responsive element
	Box-W1	37	fungal elicitor responsive element
	box E	12	/
	EIRE	8	elicitor-responsive element
	AT-rich sequence	4	element for maximal elicitor-mediated activation (2copies)
	W box	37	/
	box S	5	/
	GCC box	5	/
	WUN-motif	9	wound-responsive element
	JERE	0	/
	LTR	40	cis-acting element involved in low-temperature responsiveness
	C-repeat/DRE	2	regulatory element involved in cold- and dehydration-responsiveness
	HSE	46	cis-acting element involved in heat stress responsiveness
	MBS	62	MYB binding site involved in drought-inducibility
	CCAAT-box	30	MYBHv1 binding site
	MBSI	3	MYB binding site involved in flavonoid biosynthetic genes regulation
	MRE	25	MYB binding site involved in light responsiveness
	G-box	70	cis-acting regulatory element involved in light responsiveness
	Sp1	55	light responsive element
	G-Box	54	cis-acting regulatory element involved in light responsiveness
	GAG-motif	41	part of a light responsive element
Abiotic / biotic stress	I-box	51	part of a light responsive element
	GT1-motif	45	light responsive element
	MNF1	13	light responsive element
	ACE	26	cis-acting element involved in light responsiveness
	Box I	41	light responsive element
	Box 4	53	part of a conserved DNA module involved in light responsiveness
	GATA-motif	33	part of a light responsive element
	GA-motif	31	part of a light responsive element
	CATT-motif	27	part of a light responsive element
	AE-box	23	part of a module for light response
	TCT-motif	30	part of a light responsive element
	TCCC-motif	30	part of a light responsive element
	ATCT-motif	37	part of a conserved DNA module involved in light responsiveness
	3-AF1 binding site	13	light responsive element
	rbcS-CMA7a	5	part of a light responsive element
	LAMP-element	8	part of a light responsive element
	ATC-motif	6	part of a conserved DNA module involved in light responsiveness
	Box III	16	protein binding site
	box II	2	part of a light responsive element
	TGG-motif	3	part of a light responsive element
	chs-Unit 1 m1	4	part of a light responsive element
	chs-CMA2a	6	part of a light responsive element
	Box II	2	part of a light responsive element
	L-box	8	part of a light responsive element
	GTGGC-motif	4
	CG-motif	2	part of a light responsive element
	C-box	2	cis-acting regulatory element involved in light responsiveness
	Gap-box	6	part of a light responsive element
	CAG-motif	0	part of a light response element
	AAAC-motif	5	light responsive element
	4cl-CMA2b	3	light responsive element
	ATCC-motif	1	part of a conserved DNA module involved in light responsiveness
	GATT-motif	1
	chs-CMA2c	1
	Pc-CMA2c	0	part of a light responsive element
	chs-CMA1a	3	part of a light responsive element
	chs-CMA2b	3	part of a light responsive element
	LS7	0
	CGT-motif	1
	as-2-box	19	involved in shoot-specific expression and light responsiveness
	AAGAA-motif	44	/
	TATCCAT/C-motif	17	/
	TCCACCT-motif	21	/
	TA-rich region	7	enhancer
	3-AF3 binding site	2	part of a conserved DNA module array (CMA3)
	AT1-motif	4	part of a light responsive module
	plant_AP-2-like	3	/
	MBSII	2	MYB binding site involved in flavonoid biosynthetic genes regulation
	CTAG-motif	9	/
	H-box	4	cis-acting regulatory element involved in light responsiveness
	Box II -like sequence	1	cis-acting regulatory element
	Pc-CMA2a	2	part of a light responsive element
	AACA_motif	1	involved in endosperm-specific negative expression
	ACA-motif	1	part of gapA in (gapA-CMA1) involved with light responsiveness
	CATTAT-motif	1	/
	HD-Zip 3	1	protein binding site
	Y-box	1	/
